# Supplementary material for: Do legislated carbon reduction targets influence pro-environmental behaviours in public hospital pharmacy departments? Using mixed methods to compare Australia and the UK
Source: PLoS One. 2021 Aug 18;16(8):e0255445. doi: 10.1371/journal.pone.0255445 (PMC8372918; doi:10.1371/journal.pone.0255445)
Supplement: S5 File — (XLSX) [file pone.0255445.s013.xlsx]

## Sheet: Combined Phases I and IV
ID	Country	Gender	Role_Binary	NEP_Sc_Cat	NEP_Tot	Env_Concern	Self_Concord	Oper_Level	Q1	Q2	Q3	Q4	Q5	Q6	Q7	Q8	Q9	Q10	Q11	Q12	Q13	Q14	Q15
1	1	0	0	1	46	1	0	1	3	3	3	1	3	2	4	3	5	3	3	3	4	2	4
2	1	1	0	2	64	1	1	2	4	5	5	1	5	2	4	5	5	5	5	4	5	4	5
3	1	0	0	1	48	0	1	1	2	3	4	4	3	2	5	2	5	3	2	3	4	4	2
4	1	0	1	2	63	0	1	4	5	2	5	5	5	1	5	5	5	5	5	5	4	2	4
5	1	1	1	2	59	1	0	3	3	5	4	4	4	2	4	4	4	4	4	4	5	4	4
6	1	1	0	1	47	0	1	0	4	3	4	2	3	2	5	2	5	2	3	3	2	4	3
7	1	0	1	1	57	0	1	3	4	3	4	3	4	4	5	4	5	4	3	4	4	3	3
8	1	0	0	1	40	0	0	2	3	2	2	1	1	2	5	4	4	3	3	4	2	2	2
9	1	1	0	1	44	0	0	1	3	2	2	3	2	2	4	2	4	4	2	4	4	3	3
10	1	1	0	1	49	0	0	0	3	3	3	3	4	2	4	3	4	3	3	4	4	3	3
11	1	1	1	1	53	0	1	3	3	4	4	4	4	2	4	4	4	4	3	4	3	3	3
12	1	1	0	1	54	0	1	1	4	3	4	2	4	4	5	4	4	3	2	5	5	2	3
13	1	1	1	1	48	0	1	3	3	2	3	3	4	2	4	4	4	3	3	4	2	4	3
14	1	1	1	1	55	0	1	4	2	4	4	4	4	2	5	4	5	3	2	5	4	4	3
15	1	1	1	1	56	1	1	4	4	4	5	2	5	2	5	3	4	3	2	5	4	4	4
16	1	1	0	2	66	1	1	1	4	4	5	4	5	3	5	5	5	5	5	4	4	4	4
17	1	1	0	1	56	0	0	1	5	4	4	3	4	3	4	4	4	4	4	4	2	4	3
18	1	0	1	1	57	0	1	4	4	2	4	2	5	1	5	5	4	5	5	4	5	1	5
19	1	1	1	1	58	0	1	3	4	3	4	3	5	1	5	4	4	4	5	4	5	3	4
20	1	1	0	1	52	0	0	2	2	3	4	2	3	2	5	4	4	4	3	4	4	4	4
21	1	0	0	1	53	0	1	2	1	3	5	2	5	1	4	5	4	5	2	2	4	5	5
22	1	0	0	1	57	0	0	0	5	4	4	3	4	3	4	4	4	4	3	4	4	3	4
23	1	0	0	1	42	1	1	0	2	2	3	2	3	2	4	2	4	4	2	3	3	2	4
24	1	0	0	2	61	0	1	0	5	3	4	3	5	2	5	4	4	4	5	4	4	4	5
25	1	0	1	1	58	1	1	3	2	4	5	4	4	2	4	5	5	5	2	3	5	4	4
26	1	1	1	2	62	1	1	4	4	5	5	3	5	2	5	4	4	5	3	5	4	3	5
27	1	0	0	1	52	1	1	0	3	4	3	2	4	4	2	4	4	4	4	4	4	3	3
28	1	0	0	2	61	1	0	2	5	3	4	3	5	2	4	5	5	5	4	5	3	3	5
29	1	1	1	1	51	1	0	3	2	2	4	2	5	1	4	4	3	4	4	5	5	2	4
30	1	0	0	1	47	0	0	0	3	2	4	2	4	3	2	3	4	4	3	3	4	2	4
31	1	1	1	1	58	1	1	4	3	4	3	1	4	4	5	4	5	3	4	5	5	3	5
32	1	1	0	1	57	0	0	1	4	3	4	4	4	2	4	4	5	4	4	4	4	4	3
33	1	0	0	1	55	1	0	1	5	2	4	4	3	2	4	4	4	3	3	4	4	4	5
34	1	1	1	1	48	1	1	3	4	3	3	3	4	2	3	4	3	4	2	3	4	2	4
35	1	1	1	1	56	0	0	3	4	4	3	4	4	3	5	4	5	4	3	4	3	3	3
36	1	0	0	1	51	0	0	0	3	2	4	4	4	2	2	4	4	5	3	4	4	2	4
37	1	0	0	1	55	1	0	0	4	4	3	4	4	2	4	4	5	4	2	4	3	4	4
38	1	1	0	2	59	0	1	0	3	4	4	3	5	3	5	4	4	4	4	5	3	4	4
39	1	1	1	1	51	0	0	3	3	4	4	3	3	2	5	3	4	4	2	5	3	2	4
40	1	0	1	1	58	1	0	4	1	4	5	4	5	2	5	5	5	4	2	4	4	4	4
41	0	0	0	1	55	1	1	2	4	3	4	3	4	3	5	4	4	3	3	3	4	4	4
42	0	1	0	1	53	1	0	5	4	4	5	3	4	2	2	4	4	4	3	2	4	4	4
43	0	1	1	1	44	0	0	4	2	3	3	2	4	2	4	3	3	3	3	3	3	2	4
44	0	0	0	1	51	0	0	2	4	3	4	3	3	3	4	3	4	3	3	4	3	4	3
45	0	1	1	2	60	0	1	4	4	4	4	4	4	3	4	4	4	4	4	5	4	4	4
46	0	1	0	1	52	0	1	2	2	3	2	2	4	4	5	4	4	4	3	4	2	5	4
47	0	1	0	2	59	1	0	1	2	4	4	2	4	4	4	4	5	5	4	5	5	3	4
48	0	0	0	2	72	0	1	0	5	5	5	5	5	5	5	5	5	5	5	5	5	2	5
49	0	1	0	1	58	1	1	2	4	5	4	2	4	2	5	4	4	4	4	5	4	3	4
50	0	0	0	1	54	1	1	1	2	4	4	1	4	2	5	4	5	4	2	4	4	5	4
51	0	1	0	1	49	0	1	5	4	3	3	2	4	2	4	3	4	3	4	4	4	2	3
52	0	1	1	1	55	1	1	4	3	4	5	3	4	2	5	4	4	3	3	3	5	3	4
53	0	0	0	1	40	0	0	0	3	2	2	2	2	2	4	2	4	3	2	4	4	2	2
54	0	1	0	1	45	0	1	2	3	4	4	3	2	2	4	3	4	4	2	2	2	4	2
55	0	1	1	1	54	0	1	4	2	4	5	2	5	1	4	5	5	4	2	3	4	4	4
56	0	1	0	1	52	1	1	0	4	3	4	4	2	3	3	4	5	3	3	4	4	3	3
57	0	0	0	1	57	0	1	2	4	3	5	3	4	1	5	4	4	4	3	4	4	4	5
58	0	1	1	1	53	1	1	3	4	2	5	3	5	1	5	3	4	2	5	3	3	3	5
59	0	1	1	2	62	1	1	4	4	2	5	4	4	4	4	5	4	5	5	2	5	4	5
60	0	1	1	1	57	1	1	4	4	4	2	3	4	2	5	5	5	4	4	4	5	2	4
61	0	1	0	2	66	1	1	5	4	3	5	3	5	4	5	5	4	5	4	5	5	4	5
62	0	0	0	2	65	1	1	1	5	4	5	3	5	1	5	5	5	5	5	5	5	2	5
63	0	1	0	1	46	0	1	0	4	3	5	2	3	3	2	3	5	3	3	3	2	2	3
64	0	0	0	2	63	0	0	5	5	3	5	5	5	1	5	5	5	4	5	4	3	3	5
65	0	1	1	1	53	0	1	4	2	4	3	3	3	2	5	4	4	3	4	5	4	4	3
66	0	1	1	1	52	1	1	4	4	2	4	2	3	1	5	3	5	3	3	4	5	4	4
67	0	1	0	2	63	1	0	2	4	3	4	4	5	2	5	3	5	5	5	5	4	4	5
68	0	1	1	2	59	1	1	3	3	4	4	4	4	3	5	5	4	5	3	5	3	3	4
69	0	1	1	1	53	1	1	1	3	4	4	2	4	1	5	4	4	4	3	3	5	2	5
70	0	0	0	1	54	0	0	2	3	4	4	3	4	3	5	3	4	4	3	4	4	3	3
71	0	1	1	1	58	1	1	1	4	4	4	3	3	4	5	4	4	4	4	3	4	4	4
72	0	1	0	1	56	1	1	2	3	4	5	3	4	1	5	4	4	5	4	3	4	3	4
73	0	1	1	1	52	0	1	4	3	2	2	4	4	2	5	4	4	4	2	5	4	3	4
74	0	1	0	1	58	0	1	1	2	4	4	4	4	2	5	4	5	4	4	4	4	4	4
75	0	1	1	1	48	1	0	4	4	1	2	2	4	2	5	4	4	3	3	2	4	4	4
76	0	0	1	1	53	1	1	4	3	2	4	4	4	2	4	4	4	4	4	3	4	3	4
77	0	0	0	1	50	0	0	2	4	2	3	3	4	2	4	4	4	3	4	3	3	3	4
78	0	1	1	1	51	0	0	4	4	3	4	2	4	2	5	2	5	4	3	3	3	3	4
79	0	1	1	1	47	1	0	4	4	2	3	3	4	2	4	3	3	3	4	3	3	2	4
80	0	0	0	1	54	1	0	2	4	2	5	2	4	2	5	2	4	4	4	5	5	2	4
81	0	1	0	1	52	0	0	2	3	3	4	3	4	2	4	4	4	4	3	4	4	3	3
82	0	1	1	2	71	999	999	4	5	5	5	5	5	1	5	5	5	5	5	5	5	5	5
83	0	1	1	1	53	1	0	4	4	4	4	3	4	1	5	4	4	3	4	4	3	3	3
84	0	1	0	1	45	1	1	1	2	3	2	2	2	2	4	4	4	4	2	3	3	4	4
85	0	0	0	2	59	1	1	1	4	4	4	4	4	4	4	4	4	4	4	3	4	4	4
86	0	1	1	1	50	0	0	4	3	3	3	3	4	2	4	4	4	3	3	4	3	4	3
87	0	1	0	1	48	1	1	2	3	2	5	4	4	1	2	4	4	2	2	2	4	5	4
88	0	0	0	1	56	0	0	2	5	2	4	5	5	2	5	4	5	2	4	2	4	2	5
89	0	1	0	2	71	1	1	0	5	5	5	5	5	1	5	5	5	5	5	5	5	5	5
90	0	1	0	1	53	0	0	2	4	3	4	4	4	2	3	4	4	3	3	3	4	4	4
91	0	0	0	1	51	0	0	1	4	3	2	4	4	2	5	4	4	3	3	4	3	2	4
92	0	1	1	1	54	1	1	4	4	4	5	3	4	2	5	4	4	2	2	4	4	3	4
93	0	1	0	1	56	1	1	2	4	4	4	3	3	4	5	4	4	3	3	3	4	4	4
94	0	1	0	1	56	1	1	2	4	4	4	4	4	2	5	4	4	4	3	4	2	4	4
95	0	1	1	2	66	1	1	4	5	5	5	2	5	2	5	4	4	5	5	5	5	4	5
96	0	0	0	0	38	999	999	0	2	2	4	2	2	2	4	2	4	4	2	2	2	2	2
97	0	1	0	1	45	0	0	1	5	3	4	1	4	1	4	2	5	4	2	2	2	2	4
98	0	1	1	1	48	1	1	4	4	2	4	3	4	3	4	3	3	2	3	3	4	2	4
99	0	1	1	1	58	0	1	4	3	4	4	3	4	2	5	4	4	4	4	5	5	3	4
100	0	0	0	2	64	1	1	2	5	4	4	3	5	3	5	4	4	4	5	5	4	4	5
101	0	1	0	1	52	1	1	2	3	3	4	4	4	2	5	3	4	3	3	4	4	3	3
102	0	1	0	1	53	1	1	2	4	4	3	3	4	2	4	4	4	3	3	4	3	4	4
103	0	1	1	1	52	0	0	4	3	4	4	2	5	1	5	4	4	4	3	4	3	4	2
104	0	1	0	1	53	0	1	2	3	4	4	2	4	2	5	4	5	4	4	4	2	4	2
105	0	0	0	1	50	0	0	1	3	3	3	3	4	2	4	4	4	3	4	3	4	3	3
106	0	1	0	2	65	1	0	2	4	3	3	3	5	4	5	5	5	5	4	5	5	4	5
				Note: 999 = missing data
